# Supplementary material for: A planar dielectrophoresis-based chip for high-throughput cell pairing
Source: Royal Society of Chemistry journal article supplement (doi:10.1039/c7lc01082f), 2017-01-01
Supplement: c7lc01082f1.pdf [file c7lc01082f1.pdf]

## Supplementary Information

### A planar dielectrophoresis-based chip for high throughput cell pairing

Chunhui Wu\*, Rifei Chen, Yu Liu, Zhenming Yu, Youwei Jiang, Xing Cheng\*

Department of Materials Science and Engineering, Southern University of Science and Technology, Shenzhen 518055, People's Republic of China

#### Supplementary methods

##### 1. Detailed fabrication process of the planar chip

The glass substrates coated with indium-doped tin oxide (ITO) were purchased from Nanbo Display Technology Co. LTD (Shenzhen, China). The 100 nm sputtered ITO-coated glass had a sheet resistivity of  $20 \Omega/\square$ . Prior to use, the substrates were cleaned with ultrasonication in acetone, deionized water, and 2-propanol for 20 min each. Then, the substrates were dried under a steam of nitrogen and subjected to the treatment of UV-Ozone for 30 min, which could help to significantly improve resist adhesion. Before use, the ITO conductive glass substrate was baked at  $180^\circ\text{C}$  for 15 min.

The shape of pair A-interdigitated array (IDA) electrodes as well as all the separated fingers of pair B-IDA electrodes was patterned on the ITO-coated glass substrate by using conventional photolithography and wet etching processes. In detail, RZ 304 positive-type photoresist was firstly deposited onto the clean ITO glass using a spin coater (RCD8; Süss MicroTec, Germany). Here, the photoresist was spread onto the ITO glass at 500 rpm for 5 s and then increased to 3000 rpm for 30 s at an acceleration of 2000 rpm per second. The ITO glass substrate was then soft-baked at  $95^\circ\text{C}$  for 2 min. After baking, a chromium photomask, which was patterned for pair A-IDA electrodes as well as all the separated fingers of pair B-IDA electrodes, was applied to the photoresist-coated ITO glass and exposed to ultraviolet light using a mask aligner (MA6/BA6; Süss MicroTec, Germany). Subsequently, the resist was developed using a developer for 45 s, and the ITO glass was rinsed with deionized water and was dried under a steam of nitrogen. The ITO without cover of positive photoresist was etched with an etchant (Guangdong Huate Gas Co. LTD, China) for 2.5 min at  $38^\circ\text{C}$ . Afterwards, the remaining positive photoresist was removed using acetone. Then, SU-8 2015 (MicroChem Co., USA) was spread onto the patterned ITO

electrode substrate at 500 rpm for 15 s and then raised to 4500 rpm at an acceleration of 500 rpm per second, to a thickness of 10.5  $\mu\text{m}$ . The photoresist coated electrode substrate was then soft-baked at 95 °C for 2 min and let stand for 30 min. A chromium photo-mask patterned for the paired trap-well array was aligned with the patterned ITO electrodes and exposed to ultraviolet light. The substrate was then post-baked at 95 °C for 3 min and let stand for 10 min. Subsequently, it was developed for 2 min using an SU-8 developer (MicroChem Co., USA) and rinsed with isopropyl alcohol. Afterwards, the pad 2 and 3 of pair B-IDA electrodes was fabricated by direct-frequency magnetron sputtering (DFMS) a 1  $\mu\text{m}$ -thickness copper layer. DFMS was performed with the TRP-450 system (SKY Technology Development Co., Ltd., CAS) in pure Ar gas (99.999%). In the sputtering process, the microwell-20 array and conductive pads of pair A-IDA electrodes parts were shaded by adhesive tape. Then, the second layer of SU-8 2015 was spread at 500 rpm for 15 s, which was then increased to 1600 rpm at an acceleration of 500 rpm per second, to a thickness of 17.9  $\mu\text{m}$ . The substrate was then soft-baked at 95 °C for 4 min and let stand for 30 min. A chromium photo-mask patterned for microwell-160 array and microbaffle array was aligned with the under SU-8 layer and exposed to ultraviolet light. The substrate was then post-baked at 95 °C for 5 min and let stand for 10 min. Subsequently, it was developed for 4 min using an SU-8 developer (MicroChem Co., USA) and rinsed with isopropyl alcohol.

## 2. Preparation of HeLa cells in two different fluorescence colors

Human carcinoma (HeLa) cells were cultured as a monolayer in a 75 mm petri dish containing Dulbecco's Modified Eagle Medium supplemented with 10 % (v/v) fetal bovine serum and 1 % penicillin/streptomycin at 37 °C in a 5 % CO<sub>2</sub> atmosphere. In preparation for an experiment, the cells were harvested at the log phase of growth by 0.25 % trypsin/EDTA from the petri dish for the following fluorescence labeling process. 5,6-Carboxy-fluorescein diacetate, succinimidyl ester (CFSE) stock solution was prepared at concentrations of 2 mM in dimethyl sulphoxide (DMSO) and was stored at -20 °C. CM-DiI stock solution was prepared at concentrations of 1 mM in DMSO and was stored at -20 °C. The working concentrations of CFSE and CM-DiI for cell labeling were 20  $\mu\text{M}$  in phosphate buffered saline (PBS) buffer and 2  $\mu\text{M}$  in Dulbecco's phosphate buffered saline (D-PBS) buffer, respectively. Before usage,

cells were washed with PBS buffer and then incubated in the working solution for 5 min at 37 °C, following with an additional 15 min at room temperature. After labeling, cells were washed with PBS and resuspended in the low conductivity buffer with a concentration of  $2 \times 10^6 \text{ mL}^{-1}$ .

### 3. Preparation of the sucrose-based low conductivity buffer

The low-conductivity cell suspension buffer was consisted of 10 mM HEPES, 0.1 mM  $\text{CaCl}_2$ , 50mM D-glucose and 236 mM sucrose. <sup>1</sup>

## Supplementary discussion

### Mechanism of the positive dielectrophoresis (p-DEP) cell trapping

The cell trapping reported in this work is based on p-DEP which is the movement of cells towards the maximum of the non-uniform electric field <sup>2</sup>. In detail, cells in dielectric medium and in the presence of non-uniform electric field experience a force,  $F_{DEP}$ , which can be calculated as following:

$$F_{DEP} = 2\pi\epsilon_m a^3 \text{Re}[K(2\pi f)] \nabla E^2 \quad (1)$$

where  $\epsilon_m$  is the electrical permittivity of the medium,  $a$  is the cell radius,  $f$  is the frequency of the electric field and  $E$  is the electric field.  $K(2\pi f)$  is known as Clausius-Mossotti factor and is defined as:

$$K(2\pi f) = \frac{\epsilon_c^* - \epsilon_m^*}{\epsilon_c^* + 2\epsilon_m^*} \quad (2)$$

where  $\epsilon_c^*$  is the complex electrical permittivity of cell and  $\epsilon_m^*$  is the complex electrical permittivity of the dielectric medium. Since the electrical permittivity depends on the frequency, the Clausius-Mossotti factor is also frequency dependent. When the real part of  $K(2\pi f)$  is greater than zero, the cell moves towards the maximum of the electric field in a process known as p-DEP, and when the real part of  $K(2\pi f)$  is less than zero, the cell moves towards the minimum of the electric field in a process known as negative DEP. In the present work, cells were trapped into the cell-size microwell array by applying ac signal to the paired interdigitated array electrodes. The confined electric field near the electrodes was also the maximum electric field, which proved a p-DEP trapping of cells. <sup>1,3</sup>

### Supplementary Fig. 1

Scheme of a homemade fixture device

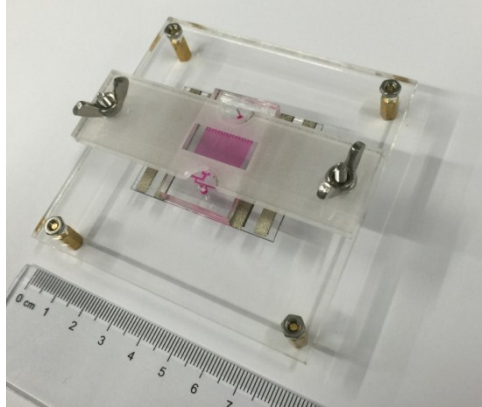

The picture exhibited that the cell pairing device was put in the fixture device. The fixture device was assembled by acrylic plate, copper pillar and wing nut.

### Supplementary Fig. 2

The photos of the 3D printed mold and replicated polydimethylsiloxane (PDMS) channel

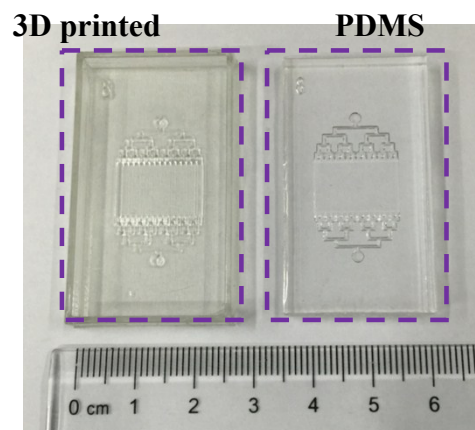

### Supplementary Fig. 3

Oscilloscope measurement of electric potential of different connection mode for green cell trapping

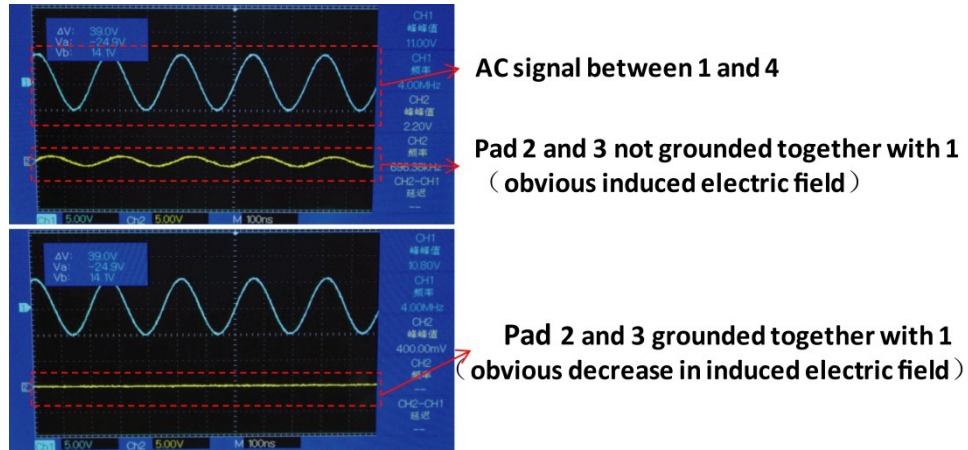

When the sinusoidal ac signal was applied to pad 1 and 4 of pair A-IDA electrodes for green cell trapping, obvious induced electric potential at pair B-IDA electrodes could be seen if pad 2 and 3 were not grounded together with pad 1.

### Supplementary Fig. 4

Fluorescence images of trapped HeLa cells stained with different colors. Scale bar: 500  $\mu\text{m}$

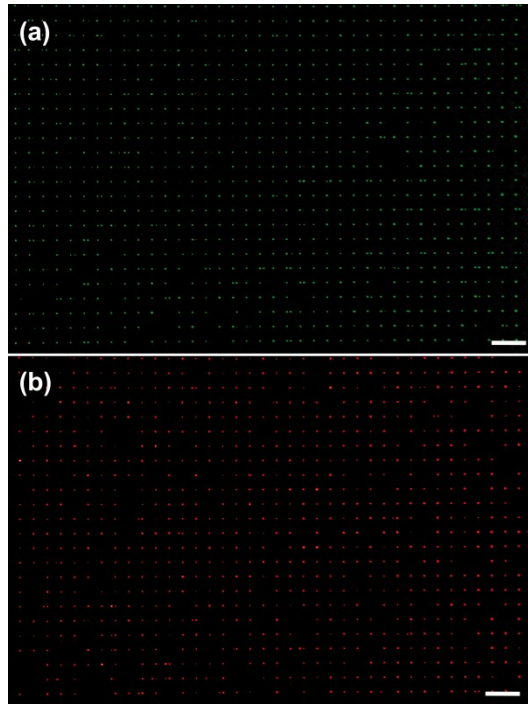

**Supplementary Fig. 5**

Photos of the PDMS at channel-80 before (left) and after (right) tightly enclosed to the planar chip by the fixture

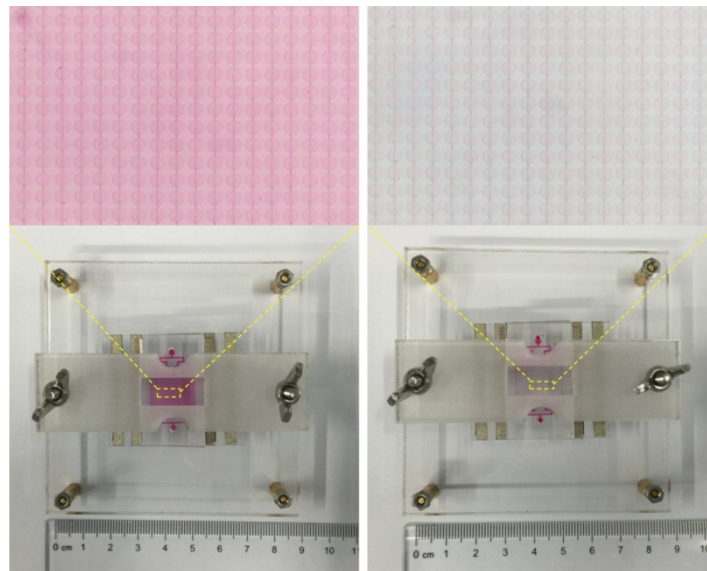

Pink ink was used to clearly exhibit the channel-80 before and after closing by the fixture. From Fig. S5, we could see clearly that when the channel-80 for cell trapping and pairing was not closed, the own channel was full of pink ink (left image). However, pink color could only be seen in microwell-160 array after channel-80 was closed (right image).

## References

- 1 S. H. Kim and T. Fujii, *Lab on a Chip*, 2016, **16**, 2440-2449.
- 2 H. A. Pohl, *J. Appl. Phys.*, 1951, **22**, 869-871.
- 3 C. Zhang, K. Khoshmanesh, A. Mitchell and K. Kalantar-zadeh, *Anal. Bioanal. Chem.*, 2010, **396**, 401-420.
